# Supplementary material for: Reversible Zn2+/Al3+intercalation in niobium-substituted polyoxometalates and demonstration of energy storage smart windows
Source: Royal Society of Chemistry journal article supplement (doi:10.1039/d3tc00264k), 2023-01-01
Supplement: d3tc00264k2.pdf [file d3tc00264k2.pdf]

## Supporting Information

### Reversible Zn<sup>2+</sup>/Al<sup>3+</sup> intercalation in niobium-substituted polyoxometalates and demonstration of energy storage smart window

Tong Feng <sup>a,b</sup>, Huili Guo <sup>a</sup>, Xiaoxiao Xing <sup>a</sup>, Yan Bai <sup>a,\*</sup>, Dongbin Dang <sup>a,\*</sup>, Weizhen Zhao <sup>b,\*</sup>

<sup>a</sup> Henan Key Laboratory of Polyoxometalate Chemistry, College of Chemistry and Chemical Engineering, Henan University, Kaifeng, Henan 475004, PR China

<sup>b</sup> Beijing Key Laboratory of Ionic Liquids Clean Process, CAS Key Laboratory of Green Process and Engineering, Institute of Process Engineering, Chinese Academy of Sciences, Beijing 100190, PR China

\* Corresponding author: E-mail address: [baiyan@henu.edu.cn](mailto:baiyan@henu.edu.cn) (Y. Bai), [dangdb@henu.edu.cn](mailto:dangdb@henu.edu.cn) (D.-B. Dang), [wzzhao@ipe.ac.cn](mailto:wzzhao@ipe.ac.cn) (W.-Z. Zhao).

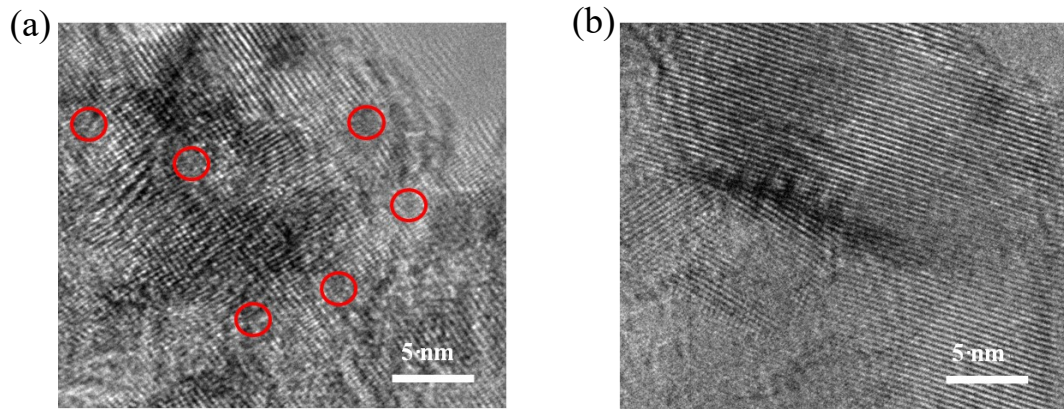

Fig. S1 Transmission electron microscopy (TEM) image of (a)  $P_2W_{15}Nb_3$ - $TiO_2$  composite film and (b)  $TiO_2$  film.

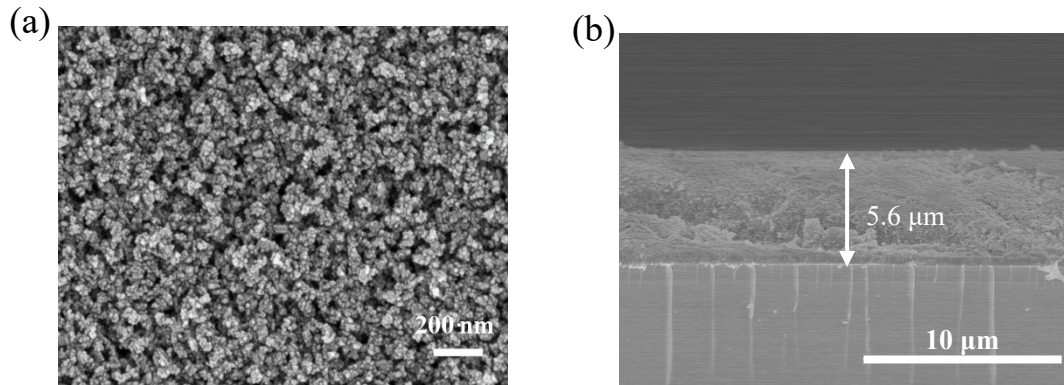

Fig. S2 (a) Top-view SEM images of  $TiO_2$  film. (b) Cross-sectional SEM image of  $P_2W_{15}Nb_3$ - $TiO_2$  composite film.

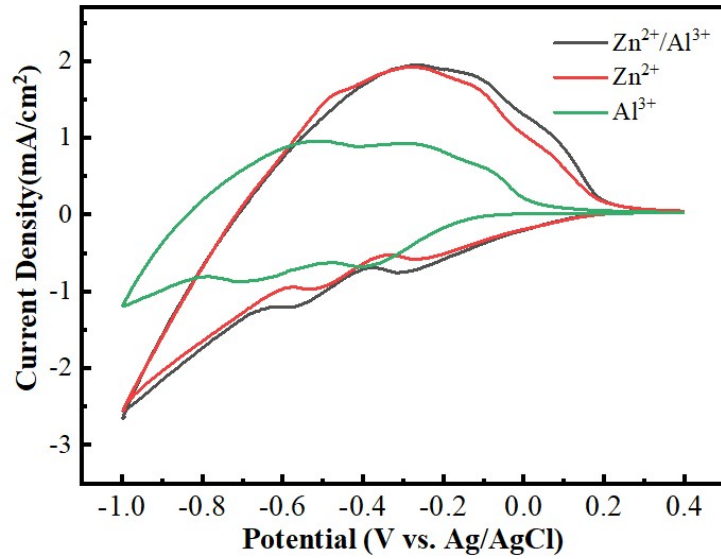

Fig. S3 CV curves of the  $P_2W_{15}Nb_3-TiO_2$  composite film in 1 M  $Zn(ClO_4)_2-Al(ClO_4)_3$ ,  $Zn(ClO_4)_2$ ,  $Al(ClO_4)_3$ .

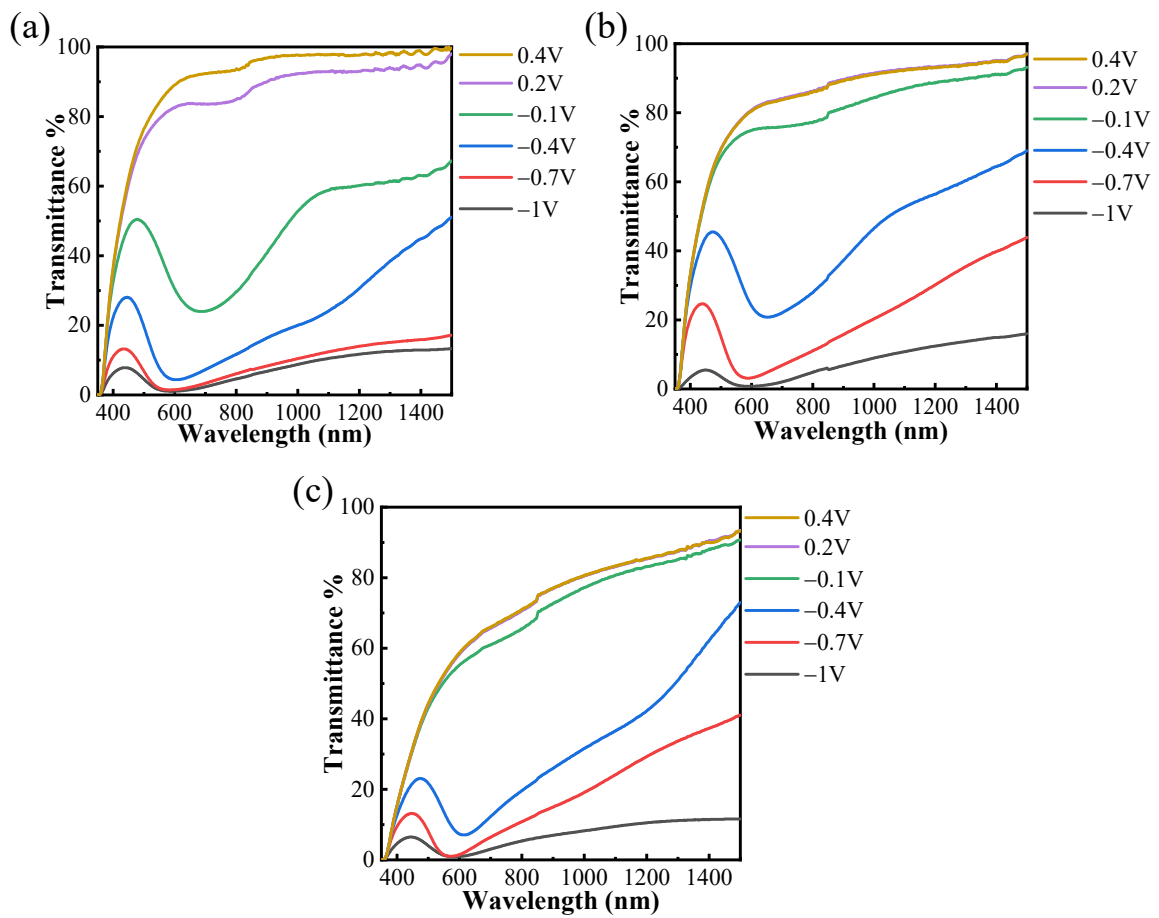

Fig. S4 Visible near-infrared transmittance spectra of  $P_2W_{15}Nb_3-TiO_2$  composite film measured from -1 to 0.4 V in (a) 1 M  $Zn(ClO_4)_2-Al(ClO_4)_3$ , (b)  $Zn(ClO_4)_2$ , (c)  $Al(ClO_4)_3$ , respectively.

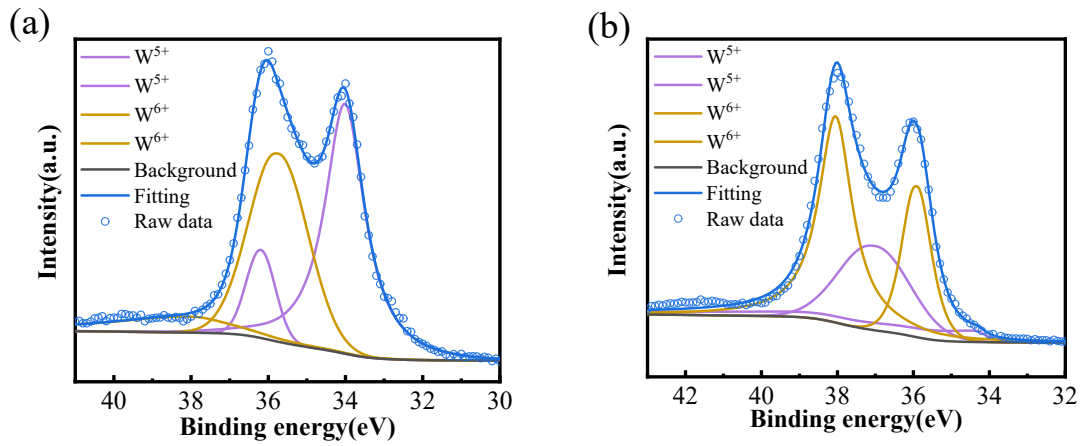

Fig. S5 W 4f XPS spectra of self-colored  $P_2W_{15}Nb_3-TiO_2$  composite film in 1 M (a)  $Zn(ClO_4)_2$ , (b)  $Al(ClO_4)_3$  electrolyte.

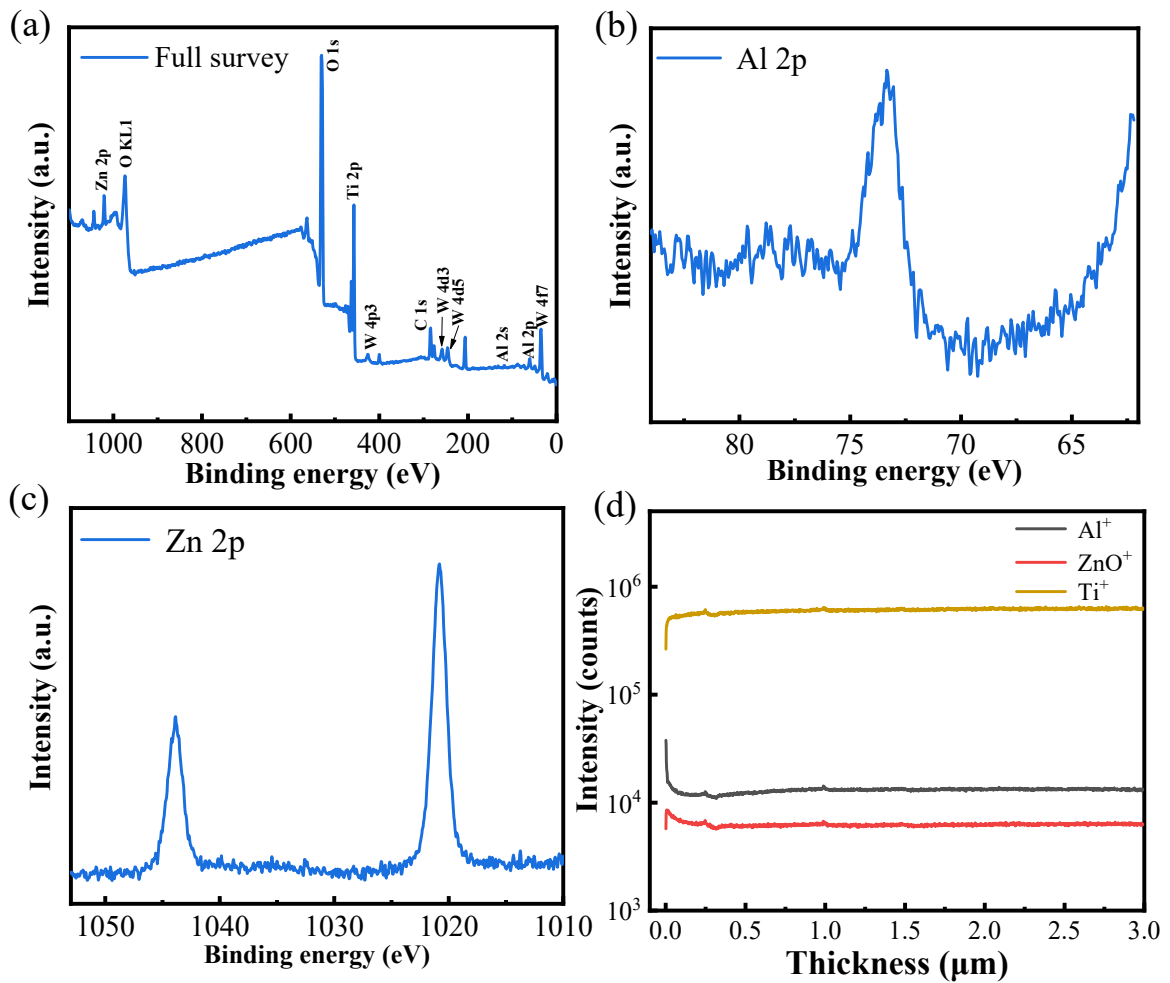

Fig. S6 (a) XPS full survey of  $P_2W_{15}Nb_3-TiO_2$  composite film. (b) Al 2p and (c) Zn 2p XPS spectra of colored  $P_2W_{15}Nb_3-TiO_2$  composite film in 1 M  $Zn(ClO_4)_2-Al(ClO_4)_3$  electrolyte. (d) TOF-SIMS depth

profiles of  $P_2W_{15}Nb_3-TiO_2$  composite film that measure at -1 V in 1 M  $Zn(ClO_4)_2-Al(ClO_4)_3$  electrolyte.

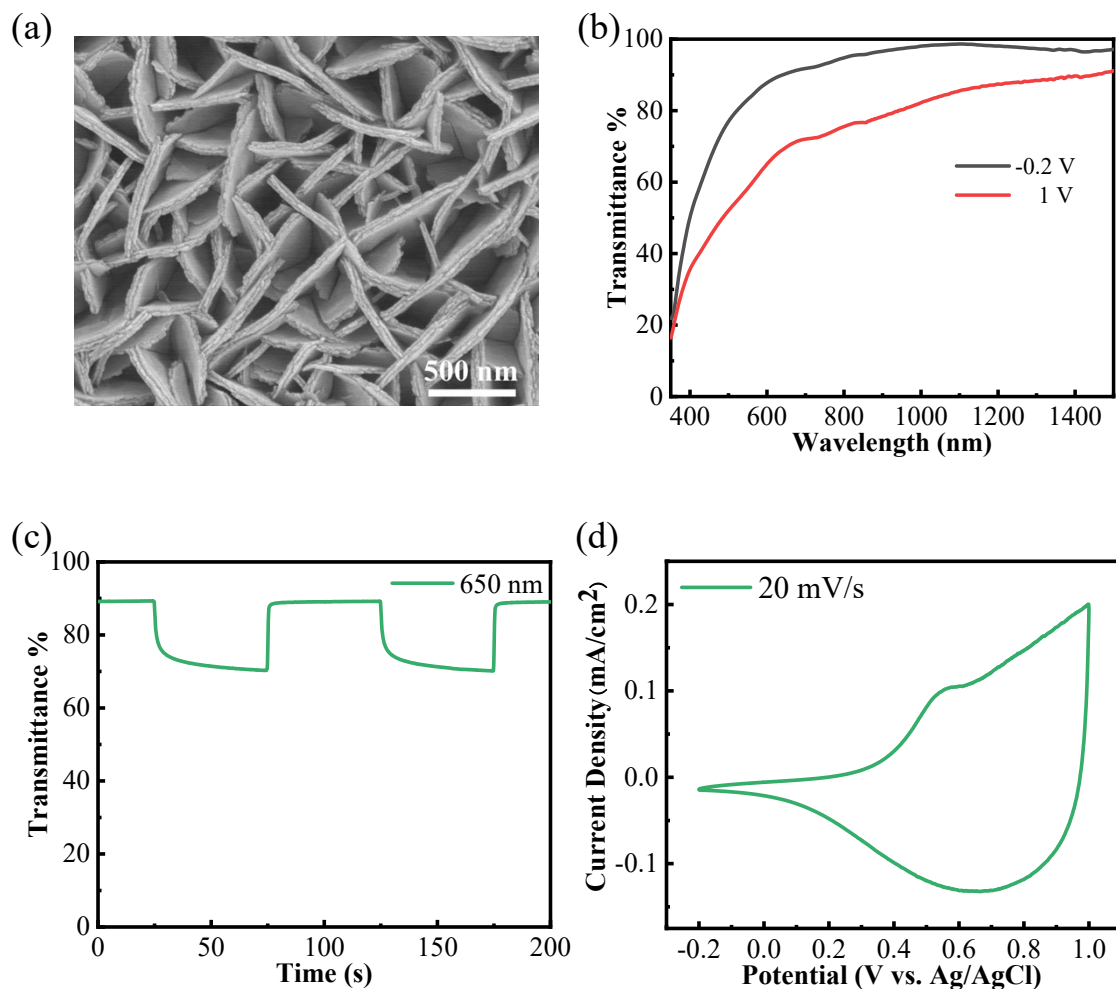

Fig. S7 (a) SEM image of NiO nanosheets. (b,c) Visible near-infrared transmittance spectra and dynamic optical transmittance measurements of the NiO film measured at -0.2 and 1 V in 1 M  $Zn(ClO_4)_2-Al(ClO_4)_3$  electrolyte. (d) CV curves of the NiO film in 1 M  $Zn(ClO_4)_2-Al(ClO_4)_3$  electrolyte.

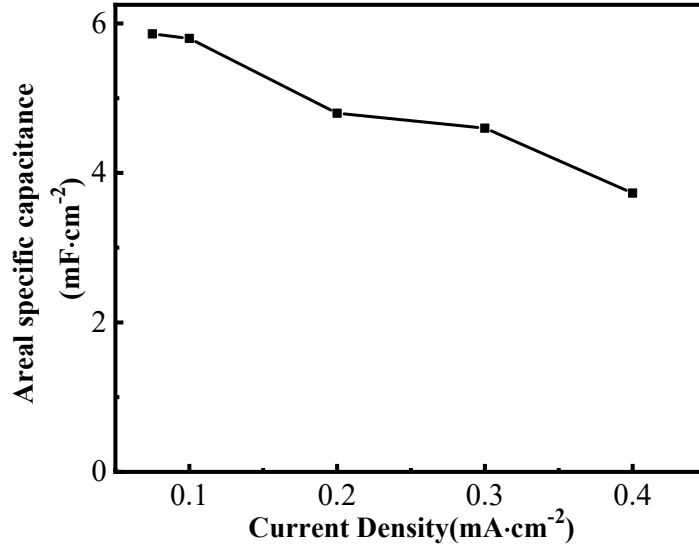

Fig. S8 Areal capacitances of EESD at different current densities.

**Table S1 Comparison of Current State-of-the-Art Electrochromic Films and Devices**

| Materials                                                        | Film or Device | $\Delta T$     | Response Time $T_b/T_c$ (s) | CE (cm <sup>2</sup> C <sup>-1</sup> ) | Areal Capability (mF cm <sup>-2</sup> ) | Spectral selectivity | Reference                |
|------------------------------------------------------------------|----------------|----------------|-----------------------------|---------------------------------------|-----------------------------------------|----------------------|--------------------------|
| P <sub>2</sub> W <sub>15</sub> Nb <sub>3</sub> -TiO <sub>2</sub> | Film           | ~90%<br>650 nm | 18/8                        | 136                                   | 52                                      | 350-1500 nm          | <b>This work</b>         |
|                                                                  | Device         | ~64%<br>650 nm | 14/4                        | 88                                    | 5.86                                    |                      |                          |
| Polyoxometalates-W <sub>18</sub> O <sub>49</sub>                 | Film           | ~30%<br>500 nm | 86/26                       | –                                     | –                                       | 350-1400 nm          | Gu et al <sup>1</sup>    |
| WO <sub>3-x</sub>                                                | Film           | ~93%<br>633 nm | 13/16                       | –                                     | –                                       | 350-1800 nm          | Zhang et al <sup>2</sup> |
|                                                                  | Device         | ~73%<br>650 nm | –                           | –                                     | –                                       |                      |                          |
| NiO-PB                                                           | Film           | ~60%<br>630 nm | 3.8/1.6                     | 45.3                                  | –                                       | 350-1000 nm          | Pan et al <sup>3</sup>   |
|                                                                  | Device         | ~67%<br>630 nm | 7.9/2.8                     | 109                                   | 11.5                                    |                      |                          |
| WO <sub>3</sub>                                                  | Device         | ~62%<br>650 nm | 1.95/1.84                   | 139                                   | 5.12                                    | 350-800 nm           | Bi et al <sup>4</sup>    |
| PICA                                                             | Film           | ~43%<br>490 nm | 0.7/1.7                     | 142                                   | 16.2                                    | 350-1000 nm          | Li et al <sup>5</sup>    |
|                                                                  | Device         | –              | –                           | –                                     | 4.3                                     |                      |                          |
| NW-P <sub>2</sub> W <sub>17</sub> -Cu(phen) <sub>2</sub>         | Film           | ~44%<br>490 nm | 9.5/2.9                     | 50.4                                  | –                                       | 400-800 nm           | Chu et al <sup>6</sup>   |

## Reference

1. H. Gu, C. Guo, S. Zhang, L. Bi, T. Li, T. Sun and S. Liu, *ACS Nano*, 2018, **12**, 559-567.
2. S. Zhang, S. Cao, T. Zhang, A. Fisher and J. Y. Lee, *Energy Environ. Sci.*, 2018, **11**, 2884-2892.
3. J. Pan, R. Zheng, Y. Wang, X. Ye, Z. Wan, C. Jia, X. Weng, J. Xie and L. Deng, *Sol. Energy Mater. Sol. Cells*, 2020, **207**, 110337.
4. Z. Bi, X. Li, Y. Chen, X. He, X. Xu and X. Gao, *ACS Appl Mater Interfaces*, 2017, **9**, 29872-29880.
5. J. Li, Q. Guo, Y. Lu and G. Nie, *European Polymer Journal*, 2019, **113**, 29-35.
6. D. Chu, X. Qu, S. Zhang, J. Zhang, Z. Liu, L. Zhou and Y. Yang, *Asia-Pac. J. Chem. Eng.*, 2022, **2779**, 1-9.
